# Supplementary material
Source: PubMed Central journal article supplement (PMC9673295)

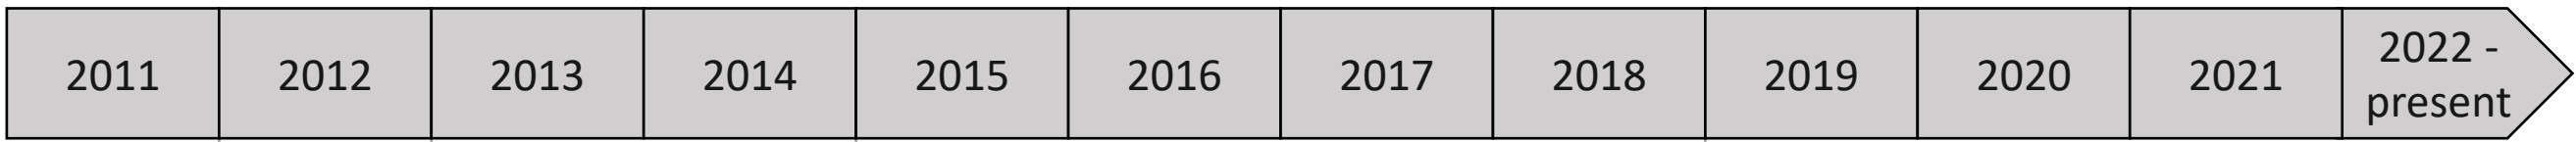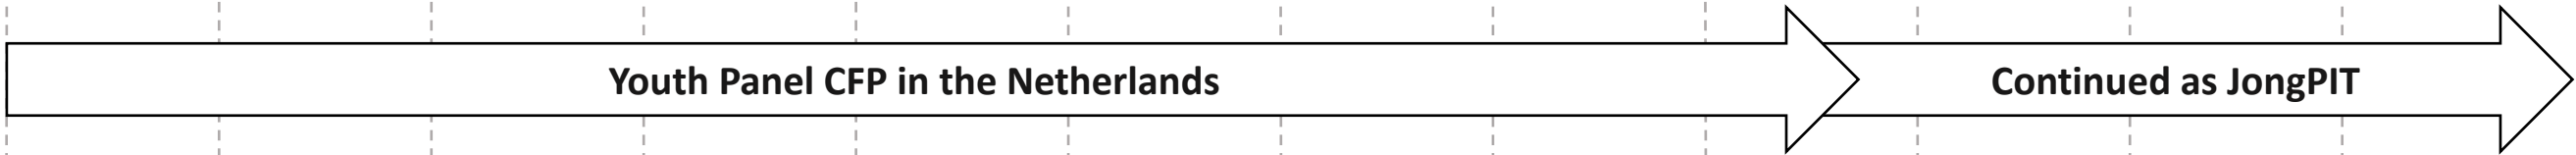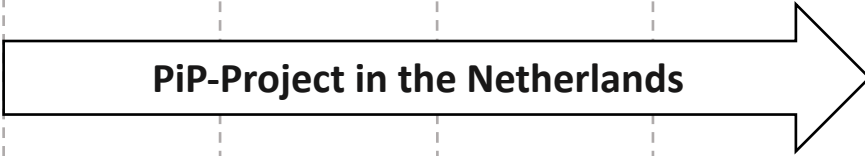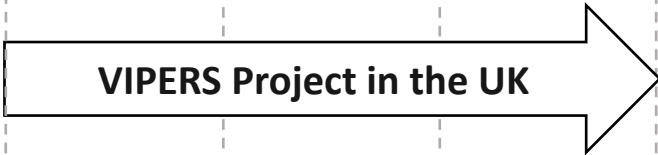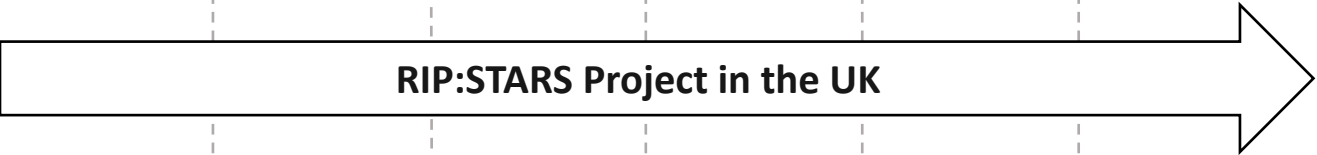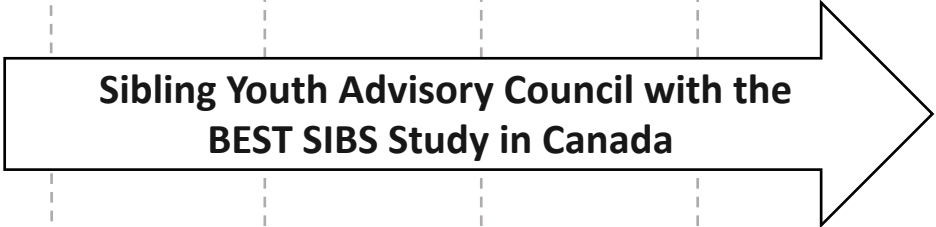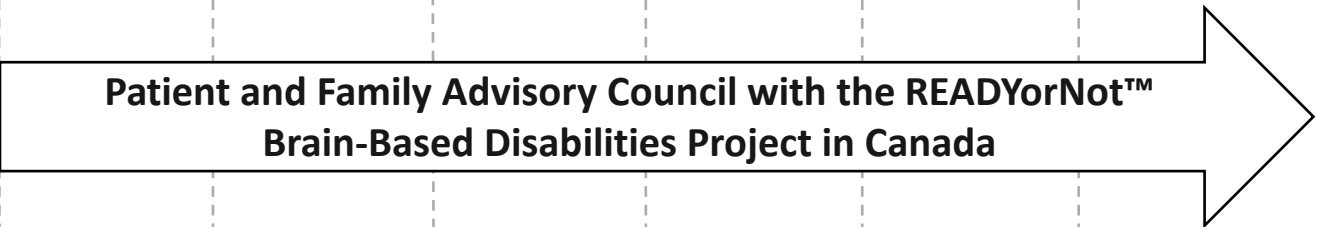

Supplement: 40900_2022_400_MOESM5_ESM.pdf [file 40900_2022_400_MOESM5_ESM.pdf]
